# Supplementary material for: A computational study of the mechanistic insights into base catalysed synthesis of cyclic carbonates from CO2: bicarbonate anion as an active species
Source: Royal Society of Chemistry journal article supplement (doi:10.1039/c5cy01902h), 2016-01-01
Supplement: c5cy01902h1.pdf [file c5cy01902h1.pdf]

## Supplementary information

### A computational study into the mechanistic insights of base catalysed synthesis of cyclic carbonates from CO<sub>2</sub>: Bicarbonate anion as active species

Kuruppathparambil Roshith Roshan, Revi Achuthan Plaissery, Amal Cherian Kathalikkattil,  
Robin Babu, George Mathai, Hwa- Soo Lee, Dae-Won Park\*

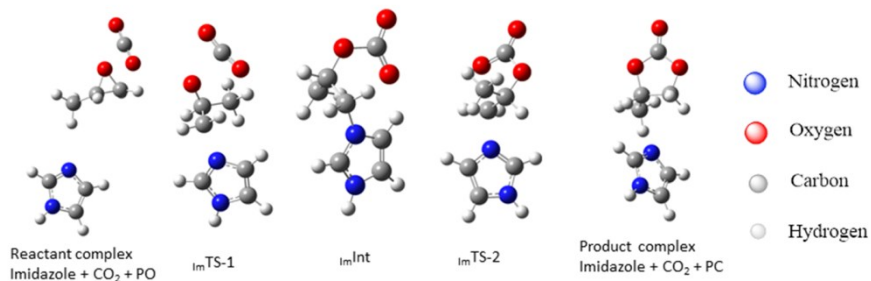

**S1a.** Optimized structural images of imidazole catalyzed PC synthesis from DFT simulations.

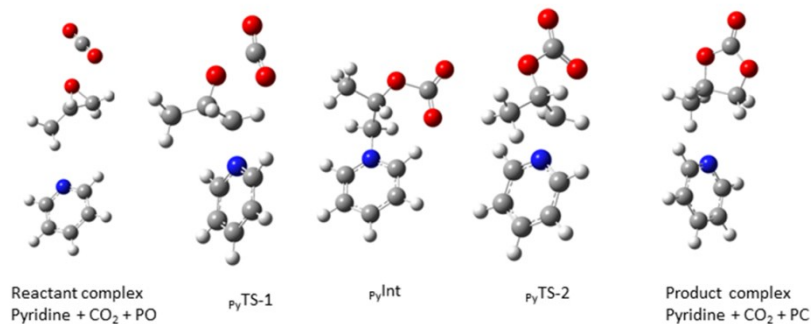

**S1b.** Optimized structural images of pyridine catalyzed PC synthesis from DFT simulations.

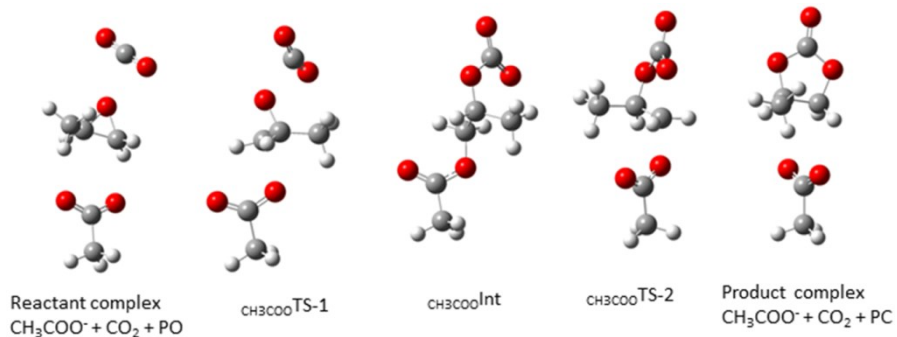

**S1c.** Optimized structural images of acetate ion catalyzed PC synthesis from DFT simulations.

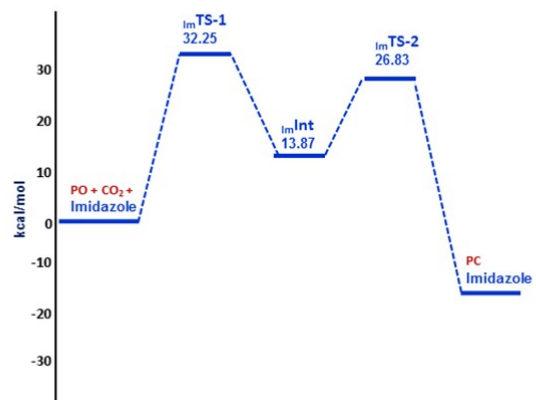

S2. Relative energy profile from DFT for imidazole mediated PC synthesis
